# Supplementary material
Source: ML conference proceedings conference paper supplement (https://proceedings.mlr.press/v32/zhangd14.html)
Supplement: Supplementary file 1 [file zhangd14-supp.zip]

Archive with 1 entries (1 files):
- Supplementary.pdf
